# Supplementary material
Source: PubMed Central journal article supplement (PMC2117406)
Supplement: jnnpsyc_77_1_114__1.pdf [file jnnpsyc_77_1_114__1.pdf]

**Table 3(S) Responses to treatment**

| Patient no./<br>age (years)<br>/sex | Duration<br>(years) | Clinical<br>phenotype | Criteria fulfilled | Treatment given    | Treatment with response |
|-------------------------------------|---------------------|-----------------------|--------------------|--------------------|-------------------------|
| 1/49/M                              | 23                  | SSM                   | AAN, INCAT         | Steroids           | Steroids                |
| 2/57/M                              | 15                  | SSM                   | -                  | Steroids, IVIg, PE | Steroids, IVIG, PE      |
| 3/55/M                              | 4                   | SSM                   | AAN, INCAT         | Steroids, IVIg, PE | PE                      |
| 4/26/F                              | 18                  | SSM                   | INCAT              | Steroids, IVIg, PE | Steroids, IVIg          |
| 5/14/M                              | 3                   | SSM                   | INCAT              | IVIg               | IVIg                    |
| 6/52/M                              | 4                   | SSM                   | INCAT              | IVIg               | IVIg                    |
| 7/74/M                              | 19                  | ASSM                  | INCAT              | Steroids, IVIg, PE | IVIg, PE                |
| 8/50/M                              | 11                  | SSM                   | -                  | Steroids, IVIg, PE | IVIg, PE                |
| 9/55/F                              | 2                   | SSM                   | AAN, INCAT         | IVIg               | IVIg                    |
| 10/57/M                             | 2                   | SSM                   | -                  | Steroids           | Steroids                |
| 11/28/F                             | 7                   | SSM                   | -                  | Steroids, IVIg, PE | IVIg, PE                |
| 12/50/F                             | 17                  | SSM                   | AAN                | Steroids, PE       | Steroids, PE            |
| 13/38/F                             | 17                  | SS                    | AAN, INCAT         | Steroids, IVIg     | Steroids, IVIg          |
| 14/32/F                             | 10                  | SSM                   | AAN, INCAT         | Steroids, IVIg     | IVIg                    |
| 15/67/M                             | 2                   | SSM                   | -                  | IVIg               | IVIg                    |
| 16/57/M                             | 8                   | DSSM                  | INCAT              | IVIg               | IVIg                    |
| 17/41/M                             | 1                   | ASSM                  | INCAT              | Steroids, IVIg     | Steroids                |
| 18/46/M                             | 4                   | ASSM                  | -                  | Steroids, IVIg     | IVIg                    |
| 19/60/M                             | 6                   | DSSM                  | -                  | Steroids, IVIg     | IVIg, Steroids          |
| 20/70/F                             | 1                   | SSM                   | INCAT              | IVIg               | IVIG                    |
| 21/17/M                             | 4                   | ASSM                  | -                  | IVIg               | IVIg                    |
| 22/72/F                             | 24                  | ASSM                  | INCAT              | IVIg               | IVIg                    |
| 23/41/F                             | 2                   | SSM                   | INCAT              | Steroids           | Steroids                |
| 24/66/F                             | 1                   | SS                    | INCAT              | IVIg               | IVIg                    |
| 25/50/F                             | 9                   | DSSM                  | -                  | Steroids, IVIg     | IVIg                    |
| 26/63/F                             | 7                   | SSM                   | -                  | Steroids, IVIg     | IVIg                    |
| 27/58/M                             | 0.5                 | SSM                   | -                  | Steroids, IVIg, PE | Steroids                |
| 28/67/M                             | 3                   | SSM                   | AAN, INCAT         | Steroids, IVIg     | IVIg                    |
| 29/71/F                             | 5                   | DSSM                  | AAN, INCAT         | Steroids, IVIg     | Steroids                |
| 30/43/M                             | 17                  | SSM                   | -                  | Steroids, IVIg, PE | Steroids, PE            |
| 31/70/M                             | 3                   | DSSM                  | -                  | IVIg               | IVIg                    |
| 32/81/F                             | 4                   | DSSM                  | INCAT              | IVIg               | IVIg                    |
| 33/46/M                             | 5                   | DSSM                  | -                  | IVIg               | IVIg                    |
| 34/62/M                             | 9                   | SSM                   | -                  | Steroids, IVIg, PE | Steroids, IVIg, PE      |
| 35/52/M                             | 18                  | SSM                   | -                  | IVIg               | IVIg                    |
| 36/66/M                             | 0.5                 | SM                    | INCAT              | Steroids           | IVIg                    |
| 37/15/M                             | 4                   | SSM                   | AAN, INCAT         | IVIg               | IVIg                    |
| 38/71/F                             | 9                   | SSM                   | INCAT              | Steroids, IVIg     | -                       |
| 39/58/M                             | 40                  | ASSM                  | -                  | Steroids, IVIg     | -                       |
| 40/60/F                             | 22                  | SSM                   | -                  | Steroids, IVIg, PE | -                       |
| 41/80/F                             | 7                   | DSSM                  | INCAT              | Steroids, IVIg, PE | -                       |
| 42/49/F                             | 9                   | SSM                   | INCAT              | Steroids, IVIg, PE | -                       |
| 43/56/M                             | 15                  | ASSM                  | -                  | Steroids, IVIg, PE | -                       |
| 44/14/F                             | 8                   | SSM                   | INCAT, AAN         | Steroids, IVIg, PE | -                       |
| 45/70/M                             | 9                   | DSSM                  | INCAT              | Steroids, IVIg, PE | -                       |
| 46/61/M                             | 3                   | SSM                   | INCAT              | Steroids, IVIg, PE | -                       |
| 47/76/M                             | 2                   | SSM                   | -                  | IVIg               | -                       |
| 48/48/M                             | 3                   | ASSM                  | -                  | Steroids, IVIg, PE | -                       |
| 49/62/M                             | 9                   | SSM                   | -                  | IVIg               | -                       |
| 50/77/M                             | 8                   | SSM                   | INCAT              | Steroids, IVIg, PE | -                       |
